# Supplementary material for: Colorectal cancer patients with different C-reactive protein levels and 5-year survival times can be differentiated with quantitative serum proteomics
Source: PLoS One. 2018 Apr 9;13(4):e0195354. doi: 10.1371/journal.pone.0195354 (PMC5891022; doi:10.1371/journal.pone.0195354)
Supplement: S2 Table — Accession, peptide count, unique peptides, confidence score, ANOVA p-value, maximum fold change and highest and lowest mean condition as well as the full protein name are given in the table. (XLSX) [file pone.0195354.s002.xlsx]

## Sheet: Sheet1
Accession	Peptide count	Unique peptides	Confidence score	Anova (p)	Max fold change	Highest mean condition	Lowest mean condition	Description
A6NGS2	4	4	22.5132	0	11.1253	SC175 39	SC1761 48	Glutamate-rich protein 4 OS=Homo sapiens GN=ERICH4 PE=4 SV=2
B9A064;P0CG04	9	4	57.3428	0	11.7484	SC1247 43	SC1761 48	Immunoglobulin lambda-like polypeptide 5 OS=Homo sapiens GN=IGLL5 PE=2 SV=2
O14756	2	2	15.7071	0	324.175	SC1247 43	SC1761 48	17-beta-hydroxysteroid dehydrogenase type 6 OS=Homo sapiens GN=HSD17B6 PE=1 SV=1
O14791	13	8	93.5406	0	5.20333	SC1247 43	SC1761 48	Apolipoprotein L1 OS=Homo sapiens GN=APOL1 PE=1 SV=5
O14986	7	7	48.016	0	3.86019	SC1768 49	SC115 38	Phosphatidylinositol 4-phosphate 5-kinase type-1 beta OS=Homo sapiens GN=PIP5K1B PE=1 SV=2
O43866	6	5	39.2257	0	4.31803	SC192 40	SC1761 48	CD5 antigen-like OS=Homo sapiens GN=CD5L PE=1 SV=1
O75348	3	2	21.6388	0	5.84965	SC1585 45	SC1569 44	V-type proton ATPase subunit G 1 OS=Homo sapiens GN=ATP6V1G1 PE=1 SV=3
O75396	2	2	17.2381	0	5.50976	SC1569 44	SC2613 56	Vesicle-trafficking protein SEC22b OS=Homo sapiens GN=SEC22B PE=1 SV=4
O75459	4	2	22.6492	0	6.59825	SC2313 53	SC383 41	P antigen family member 1 OS=Homo sapiens GN=PAGE1 PE=1 SV=2
O75636	12	10	122.774	0	3.00664	SC1569 44	SC2613 56	Ficolin-3 OS=Homo sapiens GN=FCN3 PE=1 SV=2
O75794	5	4	35.0304	0	21.0535	SC2525 55	SC1757 47	Cell division cycle protein 123 homolog OS=Homo sapiens GN=CDC123 PE=1 SV=1
O75882	40	30	270.561	0	4.7166	SC667 42	SC1585 45	Attractin OS=Homo sapiens GN=ATRN PE=1 SV=2
O95561	3	2	34.6004	0	321.166	SC2525 55	SC1761 48	Uncharacterized protein C1orf105 OS=Homo sapiens GN=C1orf105 PE=1 SV=1
P0C0L4	202	10	1801.98	0	5.04734	SC1247 43	SC192 40	Complement C4-A OS=Homo sapiens GN=C4A PE=1 SV=2
P0C0L5	205	13	1831.3	0	4.34961	SC175 39	SC1761 48	Complement C4-B OS=Homo sapiens GN=C4B PE=1 SV=2
P0C1Z6	3	3	17.1031	0	65.9046	SC1768 49	SC1569 44	TCF3 fusion partner OS=Homo sapiens GN=TFPT PE=1 SV=1
P0DJI8	30	19	189.205	0	21.7875	SC1761 48	SC2525 55	Serum amyloid A-1 protein OS=Homo sapiens GN=SAA1 PE=1 SV=1
P0DJI9	18	7	123.055	0	15.4302	SC1761 48	SC1585 45	Serum amyloid A-2 protein OS=Homo sapiens GN=SAA2 PE=1 SV=1
P00338	3	3	20.5976	0	26.982	SC1569 44	SC1761 48	L-lactate dehydrogenase A chain OS=Homo sapiens GN=LDHA PE=1 SV=2
P00450	240	212	1824.48	0	2.0192	SC1569 44	SC2525 55	Ceruloplasmin OS=Homo sapiens GN=CP PE=1 SV=1
P00488	9	7	62.96	0	3.43657	SC175 39	SC2313 53	Coagulation factor XIII A chain OS=Homo sapiens GN=F13A1 PE=1 SV=4
P00734	103	78	785.298	0	1.7526	SC1768 49	SC1569 44	Prothrombin OS=Homo sapiens GN=F2 PE=1 SV=2
P00736	64	49	595.972	0	2.08141	SC1761 48	SC2313 53	Complement C1r subcomponent OS=Homo sapiens GN=C1R PE=1 SV=2
P00739	73	12	501.02	0	5.7234	SC175 39	SC1585 45	Haptoglobin-related protein OS=Homo sapiens GN=HPR PE=2 SV=2
P00746	11	7	109.611	0	3.03727	SC2271 52	SC383 41	Complement factor D OS=Homo sapiens GN=CFD PE=1 SV=5
P00747	148	118	1396.06	0	2.24636	SC1585 45	SC1569 44	Plasminogen OS=Homo sapiens GN=PLG PE=1 SV=2
P00748	27	23	214.781	0	5.25407	SC1569 44	SC1761 48	Coagulation factor XII OS=Homo sapiens GN=F12 PE=1 SV=3
P00751	154	135	1123.75	0	2.83466	SC1761 48	SC2525 55	Complement factor B OS=Homo sapiens GN=CFB PE=1 SV=2
P00915	5	4	31.0991	0	12.6975	SC1569 44	SC192 40	Carbonic anhydrase 1 OS=Homo sapiens GN=CA1 PE=1 SV=2
P01008	97	82	882.408	0	2.79778	SC2313 53	SC1569 44	Antithrombin-III OS=Homo sapiens GN=SERPINC1 PE=1 SV=1
P01011	77	66	641.472	0	9.51177	SC2313 53	SC1247 43	Alpha-1-antichymotrypsin OS=Homo sapiens GN=SERPINA3 PE=1 SV=2
P01019	74	65	424.071	0	3.96595	SC1569 44	SC1585 45	Angiotensinogen OS=Homo sapiens GN=AGT PE=1 SV=1
P01024;A6NIN4	530	462	3733.45	0	2.55455	SC1247 43	SC1761 48	Complement C3 OS=Homo sapiens GN=C3 PE=1 SV=2
P01031	157	133	1470.79	0	1.60581	SC1569 44	SC1585 45	Complement C5 OS=Homo sapiens GN=C5 PE=1 SV=4
P01034	4	3	22.4526	0	5.78412	SC1247 43	SC1761 48	Cystatin-C OS=Homo sapiens GN=CST3 PE=1 SV=1
P01042	68	58	697.721	0	1.60604	SC2313 53	SC1569 44	Kininogen-1 OS=Homo sapiens GN=KNG1 PE=1 SV=2
P01591	4	3	31.4655	0	2.32618	SC1247 43	SC2313 53	Immunoglobulin J chain OS=Homo sapiens GN=JCHAIN PE=1 SV=4
P01730	8	6	45.2973	0	9.86287	SC2070 51	SC2313 53	T-cell surface glycoprotein CD4 OS=Homo sapiens GN=CD4 PE=1 SV=1
P01833	2	2	12.3094	0	184.456	SC1569 44	SC2313 53	Polymeric immunoglobulin receptor OS=Homo sapiens GN=PIGR PE=1 SV=4
P02042	5	4	39.3557	0	2.0473	SC115 38	SC2384 54	Hemoglobin subunit delta OS=Homo sapiens GN=HBD PE=1 SV=2
P02649	46	39	392.909	0	3.00566	SC1585 45	SC1247 43	Apolipoprotein E OS=Homo sapiens GN=APOE PE=1 SV=1
P02654	9	5	60.5018	0	12.6255	SC1569 44	SC1761 48	Apolipoprotein C-I OS=Homo sapiens GN=APOC1 PE=1 SV=1
P02655	9	8	116.169	0	12.6641	SC1585 45	SC1757 47	Apolipoprotein C-II OS=Homo sapiens GN=APOC2 PE=1 SV=1
P02656	24	21	150.215	0	3.33203	SC1585 45	SC1569 44	Apolipoprotein C-III OS=Homo sapiens GN=APOC3 PE=1 SV=1
P02741	3	2	29.3015	0	9.27223	SC1569 44	SC175 39	C-reactive protein OS=Homo sapiens GN=CRP PE=1 SV=1
P02745	10	8	72.2636	0	6.61458	SC667 42	SC1757 47	Complement C1q subcomponent subunit A OS=Homo sapiens GN=C1QA PE=1 SV=2
P02746	23	16	201.495	0	1.74477	SC2313 53	SC1585 45	Complement C1q subcomponent subunit B OS=Homo sapiens GN=C1QB PE=1 SV=3
P02747	15	12	137.95	0	2.73262	SC2313 53	SC1585 45	Complement C1q subcomponent subunit C OS=Homo sapiens GN=C1QC PE=1 SV=3
P02748	75	61	732.052	0	2.13392	SC1825 50	SC383 41	Complement component C9 OS=Homo sapiens GN=C9 PE=1 SV=2
P02749;Q0JRZ9	59	49	418.585	0	2.07484	SC1768 49	SC2613 56	Beta-2-glycoprotein 1 OS=Homo sapiens GN=APOH PE=1 SV=3
P02750	42	34	358.936	0	12.4911	SC2313 53	SC1585 45	Leucine-rich alpha-2-glycoprotein OS=Homo sapiens GN=LRG1 PE=1 SV=2
P02753	13	10	83.9946	0	5.99369	SC1761 48	SC1757 47	Retinol-binding protein 4 OS=Homo sapiens GN=RBP4 PE=1 SV=3
P02760	67	55	561.01	0	1.70667	SC1768 49	SC1757 47	Protein AMBP OS=Homo sapiens GN=AMBP PE=1 SV=1
P02765	69	57	384.808	0	2.51452	SC1768 49	SC2613 56	Alpha-2-HS-glycoprotein OS=Homo sapiens GN=AHSG PE=1 SV=1
P02766	21	19	205.229	0	6.10857	SC667 42	SC1569 44	Transthyretin OS=Homo sapiens GN=TTR PE=1 SV=1
P02774	171	142	1088.02	0	1.92382	SC1761 48	SC175 39	Vitamin D-binding protein OS=Homo sapiens GN=GC PE=1 SV=1
P02775	21	19	119.044	0	2.329	SC1825 50	SC1569 44	Platelet basic protein OS=Homo sapiens GN=PPBP PE=1 SV=3
P02776	9	5	55.3162	0	2.56298	SC1569 44	SC2384 54	Platelet factor 4 OS=Homo sapiens GN=PF4 PE=1 SV=2
P02790;Q9UHE8;P42336;Q7Z6G3;Q9NXR7;Q9NZ08	177	147	1018.77	0	2.5512	SC1757 47	SC1585 45	Hemopexin OS=Homo sapiens GN=HPX PE=1 SV=2
P03951	23	22	162.913	0	2.37482	SC667 42	SC2313 53	Coagulation factor XI OS=Homo sapiens GN=F11 PE=1 SV=1
P03952	57	48	544.954	0	1.92584	SC667 42	SC2613 56	Plasma kallikrein OS=Homo sapiens GN=KLKB1 PE=1 SV=1
P04003	55	43	417.489	0	3.44468	SC2525 55	SC1585 45	C4b-binding protein alpha chain OS=Homo sapiens GN=C4BPA PE=1 SV=2
P04004	76	65	445.283	0	1.87798	SC2525 55	SC667 42	Vitronectin OS=Homo sapiens GN=VTN PE=1 SV=1
P04083	15	10	82.2031	0	1.73461	SC2313 53	SC1247 43	Annexin A1 OS=Homo sapiens GN=ANXA1 PE=1 SV=2
P04180	9	9	52.5074	0	2.61328	SC667 42	SC2313 53	Phosphatidylcholine-sterol acyltransferase OS=Homo sapiens GN=LCAT PE=1 SV=1
P04196	73	66	406.116	0	5.57566	SC667 42	SC1761 48	Histidine-rich glycoprotein OS=Homo sapiens GN=HRG PE=1 SV=1
P04217	79	66	606.89	0	2.23696	SC667 42	SC2313 53	Alpha-1B-glycoprotein OS=Homo sapiens GN=A1BG PE=1 SV=4
P04264	30	21	310.006	0	5.07728	SC2070 51	SC1768 49	Keratin, type II cytoskeletal 1 OS=Homo sapiens GN=KRT1 PE=1 SV=6
P04278	26	23	259.765	0	6.08715	SC667 42	SC2384 54	Sex hormone-binding globulin OS=Homo sapiens GN=SHBG PE=1 SV=2
P05090	27	24	213.125	0	2.54488	SC175 39	SC1569 44	Apolipoprotein D OS=Homo sapiens GN=APOD PE=1 SV=1
P05155	75	59	610.546	0	1.77648	SC1761 48	SC1247 43	Plasma protease C1 inhibitor OS=Homo sapiens GN=SERPING1 PE=1 SV=2
P05452	23	17	245.354	0	4.59688	SC1761 48	SC1569 44	Tetranectin OS=Homo sapiens GN=CLEC3B PE=1 SV=3
P05534	4	2	16.1136	0	701.489	SC1825 50	SC2384 54	HLA class I histocompatibility antigen, A-24 alpha chain OS=Homo sapiens GN=HLA-A PE=1 SV=2
P05543	30	23	251.326	0	3.02576	SC1757 47	SC1748 46	Thyroxine-binding globulin OS=Homo sapiens GN=SERPINA7 PE=1 SV=2
P05546	60	54	521.264	0	2.47735	SC2313 53	SC1761 48	Heparin cofactor 2 OS=Homo sapiens GN=SERPIND1 PE=1 SV=3
P06276	28	24	229.242	0	5.4309	SC1569 44	SC1585 45	Cholinesterase OS=Homo sapiens GN=BCHE PE=1 SV=1
P06396	82	68	797.763	0	3.36672	SC1768 49	SC1569 44	Gelsolin OS=Homo sapiens GN=GSN PE=1 SV=1
P06727	106	88	985.125	0	6.84404	SC1761 48	SC1569 44	Apolipoprotein A-IV OS=Homo sapiens GN=APOA4 PE=1 SV=3
P07225	61	49	549.231	0	2.0683	SC1569 44	SC383 41	Vitamin K-dependent protein S OS=Homo sapiens GN=PROS1 PE=1 SV=1
P07358	66	60	729.587	0	1.85922	SC1761 48	SC2313 53	Complement component C8 beta chain OS=Homo sapiens GN=C8B PE=1 SV=3
P07360	18	15	192.888	0	1.77834	SC1761 48	SC192 40	Complement component C8 gamma chain OS=Homo sapiens GN=C8G PE=1 SV=3
P07900	6	2	41.8792	0	4.01084	SC1569 44	SC2313 53	Heat shock protein HSP 90-alpha OS=Homo sapiens GN=HSP90AA1 PE=1 SV=5
P07996	73	61	640.831	0	3.97736	SC175 39	SC1761 48	Thrombospondin-1 OS=Homo sapiens GN=THBS1 PE=1 SV=2
P08185	25	22	235.691	0	4.19562	SC1569 44	SC1585 45	Corticosteroid-binding globulin OS=Homo sapiens GN=SERPINA6 PE=1 SV=1
P08294	3	3	21.8205	0	18.2767	SC667 42	SC2313 53	Extracellular superoxide dismutase [Cu-Zn] OS=Homo sapiens GN=SOD3 PE=1 SV=2
P08571	17	16	159.639	0	2.80782	SC1569 44	SC2313 53	Monocyte differentiation antigen CD14 OS=Homo sapiens GN=CD14 PE=1 SV=2
P08603	124	96	1184.66	0	2.72749	SC1757 47	SC1768 49	Complement factor H OS=Homo sapiens GN=CFH PE=1 SV=4
P08697	36	33	377.718	0	2.2262	SC1825 50	SC2613 56	Alpha-2-antiplasmin OS=Homo sapiens GN=SERPINF2 PE=1 SV=3
P08709	13	10	86.273	0	2.10538	SC1569 44	SC1748 46	Coagulation factor VII OS=Homo sapiens GN=F7 PE=1 SV=1
P08779	10	8	61.79	0	11.6257	SC2070 51	SC667 42	Keratin, type I cytoskeletal 16 OS=Homo sapiens GN=KRT16 PE=1 SV=4
P08887	2	2	9.5939	0	73.5601	SC2313 53	SC383 41	Interleukin-6 receptor subunit alpha OS=Homo sapiens GN=IL6R PE=1 SV=1
P09172	10	7	68.1236	0	8.09993	SC1761 48	SC1569 44	Dopamine beta-hydroxylase OS=Homo sapiens GN=DBH PE=1 SV=3
P09486	7	5	48.3722	0	3.0502	SC1757 47	SC1569 44	SPARC OS=Homo sapiens GN=SPARC PE=1 SV=1
P09871	60	52	607.644	0	2.08818	SC1569 44	SC175 39	Complement C1s subcomponent OS=Homo sapiens GN=C1S PE=1 SV=1
P10643	68	53	664.576	0	2.39249	SC1585 45	SC1757 47	Complement component C7 OS=Homo sapiens GN=C7 PE=1 SV=2
P10720	9	5	71.9215	0	5.8857	SC1569 44	SC1761 48	Platelet factor 4 variant OS=Homo sapiens GN=PF4V1 PE=1 SV=1
P12314	4	3	22.1705	0	16.6388	SC1585 45	SC1247 43	High affinity immunoglobulin gamma Fc receptor I OS=Homo sapiens GN=FCGR1A PE=1 SV=2
P13645;Q7Z3Y8;Q7Z3Z0	22	19	214.411	0	15.0367	SC2070 51	SC2313 53	Keratin, type I cytoskeletal 10 OS=Homo sapiens GN=KRT10 PE=1 SV=6
P13671	78	65	738.523	0	2.39422	SC1247 43	SC1825 50	Complement component C6 OS=Homo sapiens GN=C6 PE=1 SV=3
P13796	16	10	105.543	0	3.13375	SC1247 43	SC2313 53	Plastin-2 OS=Homo sapiens GN=LCP1 PE=1 SV=6
P14373	4	3	32.1073	0	4.88085	SC1585 45	SC1757 47	Zinc finger protein RFP OS=Homo sapiens GN=TRIM27 PE=1 SV=1
P14902	4	3	22.5121	0	4.47976	SC667 42	SC2313 53	Indoleamine 2,3-dioxygenase 1 OS=Homo sapiens GN=IDO1 PE=1 SV=1
P14920	5	2	41.8362	0	22.8859	SC1757 47	SC1247 43	D-amino-acid oxidase OS=Homo sapiens GN=DAO PE=1 SV=3
P15169	26	21	248.707	0	3.61935	SC115 38	SC1825 50	Carboxypeptidase N catalytic chain OS=Homo sapiens GN=CPN1 PE=1 SV=1
P16619	3	3	22.3958	0	14.1349	SC115 38	SC1585 45	C-C motif chemokine 3-like 1 OS=Homo sapiens GN=CCL3L1 PE=1 SV=1
P17936	20	14	153.089	0	2.50553	SC1761 48	SC2313 53	Insulin-like growth factor-binding protein 3 OS=Homo sapiens GN=IGFBP3 PE=1 SV=2
P18065	5	5	33.0439	0	6.59592	SC1761 48	SC667 42	Insulin-like growth factor-binding protein 2 OS=Homo sapiens GN=IGFBP2 PE=1 SV=2
P18428	12	10	89.7256	0	29.4746	SC1569 44	SC1585 45	Lipopolysaccharide-binding protein OS=Homo sapiens GN=LBP PE=1 SV=3
P19823	115	97	858.093	0	3.30912	SC1768 49	SC2313 53	Inter-alpha-trypsin inhibitor heavy chain H2 OS=Homo sapiens GN=ITIH2 PE=1 SV=2
P19827	88	74	779.158	0	3.21805	SC1768 49	SC2313 53	Inter-alpha-trypsin inhibitor heavy chain H1 OS=Homo sapiens GN=ITIH1 PE=1 SV=3
P20742	60	31	442.001	0	2.22772	SC1757 47	SC1585 45	Pregnancy zone protein OS=Homo sapiens GN=PZP PE=1 SV=4
P22061	2	2	9.0599	0	27.8841	SC175 39	SC1585 45	Protein-L-isoaspartate(D-aspartate) O-methyltransferase OS=Homo sapiens GN=PCMT1 PE=1 SV=4
P22352	23	16	160.859	0	5.77118	SC1768 49	SC1569 44	Glutathione peroxidase 3 OS=Homo sapiens GN=GPX3 PE=1 SV=2
P22792	30	27	286.144	0	4.59126	SC1569 44	SC1761 48	Carboxypeptidase N subunit 2 OS=Homo sapiens GN=CPN2 PE=1 SV=3
P22891	10	9	68.8271	0	6.47454	SC175 39	SC1569 44	Vitamin K-dependent protein Z OS=Homo sapiens GN=PROZ PE=1 SV=2
P23142	12	10	81.6696	0	4.17706	SC1247 43	SC1761 48	Fibulin-1 OS=Homo sapiens GN=FBLN1 PE=1 SV=4
P24385	2	2	18.8602	0	8.9894	SC175 39	SC1569 44	G1/S-specific cyclin-D1 OS=Homo sapiens GN=CCND1 PE=1 SV=1
P25311	25	20	176.49	0	2.6176	SC2525 55	SC1569 44	Zinc-alpha-2-glycoprotein OS=Homo sapiens GN=AZGP1 PE=1 SV=2
P25705	2	2	11.7736	0	3.10199	SC1768 49	SC2384 54	ATP synthase subunit alpha, mitochondrial OS=Homo sapiens GN=ATP5A1 PE=1 SV=1
P26927	46	35	358.764	0	4.3668	SC2313 53	SC1825 50	Hepatocyte growth factor-like protein OS=Homo sapiens GN=MST1 PE=1 SV=2
P27169	22	18	280.854	0	3.52262	SC1768 49	SC1569 44	Serum paraoxonase/arylesterase 1 OS=Homo sapiens GN=PON1 PE=1 SV=3
P28062	4	4	28.7187	0	9.19748	SC1569 44	SC1761 48	Proteasome subunit beta type-8 OS=Homo sapiens GN=PSMB8 PE=1 SV=3
P29218	5	5	31.9562	0	8.10034	SC1761 48	SC192 40	Inositol monophosphatase 1 OS=Homo sapiens GN=IMPA1 PE=1 SV=1
P29622	2	2	13.2682	0	5.99634	SC1757 47	SC1569 44	Kallistatin OS=Homo sapiens GN=SERPINA4 PE=1 SV=3
P31270	3	3	23.4817	0	6.33319	SC1761 48	SC1569 44	Homeobox protein Hox-A11 OS=Homo sapiens GN=HOXA11 PE=2 SV=2
P32119	2	2	20.1164	0	37.9564	SC1569 44	SC1757 47	Peroxiredoxin-2 OS=Homo sapiens GN=PRDX2 PE=1 SV=5
P35372	2	2	11.3036	0	109.4	SC1569 44	SC1768 49	Mu-type opioid receptor OS=Homo sapiens GN=OPRM1 PE=1 SV=2
P35527	15	13	108.065	0	5.29282	SC2070 51	SC2525 55	Keratin, type I cytoskeletal 9 OS=Homo sapiens GN=KRT9 PE=1 SV=3
P35542	6	5	73.9389	0	10.6029	SC1761 48	SC1247 43	Serum amyloid A-4 protein OS=Homo sapiens GN=SAA4 PE=1 SV=2
P35858	36	35	327.543	0	1.52193	SC667 42	SC2613 56	Insulin-like growth factor-binding protein complex acid labile subunit OS=Homo sapiens GN=IGFALS PE=1 SV=1
P35908	14	6	105.052	0	5.42764	SC2070 51	SC1569 44	Keratin, type II cytoskeletal 2 epidermal OS=Homo sapiens GN=KRT2 PE=1 SV=2
P36955	34	30	312.483	0	2.86963	SC2525 55	SC1585 45	Pigment epithelium-derived factor OS=Homo sapiens GN=SERPINF1 PE=1 SV=4
P36980	11	5	86.3959	0	3.11566	SC1585 45	SC667 42	Complement factor H-related protein 2 OS=Homo sapiens GN=CFHR2 PE=1 SV=1
P37088	5	5	39.7374	0	29.4424	SC2313 53	SC383 41	Amiloride-sensitive sodium channel subunit alpha OS=Homo sapiens GN=SCNN1A PE=1 SV=1
P42081	3	2	15.3184	0	3.42889	SC1748 46	SC115 38	T-lymphocyte activation antigen CD86 OS=Homo sapiens GN=CD86 PE=1 SV=2
P43251	24	22	180.181	0	2.29814	SC175 39	SC1761 48	Biotinidase OS=Homo sapiens GN=BTD PE=1 SV=2
P43652	83	72	784.896	0	3.52461	SC2313 53	SC1569 44	Afamin OS=Homo sapiens GN=AFM PE=1 SV=1
P48426	5	3	29.6807	0	4.00276	SC192 40	SC1585 45	Phosphatidylinositol 5-phosphate 4-kinase type-2 alpha OS=Homo sapiens GN=PIP4K2A PE=1 SV=2
P49747	29	26	181.105	0	2.18168	SC175 39	SC1761 48	Cartilage oligomeric matrix protein OS=Homo sapiens GN=COMP PE=1 SV=2
P49908	13	8	95.937	0	3.09705	SC1585 45	SC1569 44	Selenoprotein P OS=Homo sapiens GN=SEPP1 PE=1 SV=3
P51884	29	27	267.687	0	2.98405	SC1761 48	SC115 38	Lumican OS=Homo sapiens GN=LUM PE=1 SV=2
P60709;P63261	31	14	245.395	0	2.86358	SC2271 52	SC115 38	Actin, cytoplasmic 1 OS=Homo sapiens GN=ACTB PE=1 SV=1
P63267	22	3	166.027	0	8.5451	SC1761 48	SC2525 55	Actin, gamma-enteric smooth muscle OS=Homo sapiens GN=ACTG2 PE=1 SV=1
P68032;P68133	23	2	172.471	0	2.57335	SC1761 48	SC2525 55	Actin, alpha cardiac muscle 1 OS=Homo sapiens GN=ACTC1 PE=1 SV=1
P68871	8	4	77.9984	0	18.0126	SC1569 44	SC667 42	Hemoglobin subunit beta OS=Homo sapiens GN=HBB PE=1 SV=2
P69891;P69892	2	2	10.5925	0	7.68702	SC2525 55	SC115 38	Hemoglobin subunit gamma-1 OS=Homo sapiens GN=HBG1 PE=1 SV=2
P69905	8	6	109.303	0	51.2592	SC1569 44	SC1748 46	Hemoglobin subunit alpha OS=Homo sapiens GN=HBA1 PE=1 SV=2
P78380	2	2	9.2537	0	19.1027	SC2313 53	SC667 42	Oxidized low-density lipoprotein receptor 1 OS=Homo sapiens GN=OLR1 PE=1 SV=1
P80108	15	11	103.692	0	6.85357	SC115 38	SC2525 55	Phosphatidylinositol-glycan-specific phospholipase D OS=Homo sapiens GN=GPLD1 PE=1 SV=3
Q5T5A8	2	2	23.5588	0	30.9308	SC192 40	SC1585 45	Late cornified envelope protein 3C OS=Homo sapiens GN=LCE3C PE=1 SV=1
Q6Q4G3	4	3	24.745	0	3.77547	SC115 38	SC1247 43	Aminopeptidase Q OS=Homo sapiens GN=LVRN PE=1 SV=4
Q6S8J3	44	11	302.416	0	11.7689	SC1761 48	SC1569 44	POTE ankyrin domain family member E OS=Homo sapiens GN=POTEE PE=1 SV=3
Q6ZMR5	4	4	32.8612	0	10.4952	SC1569 44	SC1761 48	Transmembrane protease serine 11A OS=Homo sapiens GN=TMPRSS11A PE=1 SV=1
Q6ZS52	2	2	10.5358	0	12.9235	SC1569 44	SC2384 54	Putative uncharacterized protein FLJ45825 OS=Homo sapiens PE=5 SV=1
Q6ZSA8	2	2	16.4398	0	41.5003	SC115 38	SC667 42	Putative uncharacterized protein FLJ45684 OS=Homo sapiens PE=5 SV=2
Q7Z794	10	7	68.0777	0	3.67713	SC1761 48	SC1569 44	Keratin, type II cytoskeletal 1b OS=Homo sapiens GN=KRT77 PE=2 SV=3
Q8IWR1	4	2	33.111	0	7.12415	SC1569 44	SC1761 48	Tripartite motif-containing protein 59 OS=Homo sapiens GN=TRIM59 PE=1 SV=1
Q8N5P1	3	2	17.4612	0	78.3449	SC383 41	SC2313 53	Zinc finger CCCH domain-containing protein 8 OS=Homo sapiens GN=ZC3H8 PE=1 SV=2
Q8N9V7;P63241;Q96A32	10	3	60.0297	0	2.88322	SC1569 44	SC1757 47	Testis- and ovary-specific PAZ domain-containing protein 1 OS=Homo sapiens GN=TOPAZ1 PE=2 SV=3
Q8NB91	3	3	28.5534	0	2.83913	SC1569 44	SC2384 54	Fanconi anemia group B protein OS=Homo sapiens GN=FANCB PE=1 SV=1
Q8ND56	3	3	22.7715	0	5.92631	SC1768 49	SC1757 47	Protein LSM14 homolog A OS=Homo sapiens GN=LSM14A PE=1 SV=3
Q8TBX8	9	4	59.549	0	2.56121	SC1247 43	SC175 39	Phosphatidylinositol 5-phosphate 4-kinase type-2 gamma OS=Homo sapiens GN=PIP4K2C PE=1 SV=3
Q8TF21	3	2	20.2728	0	8.7527	SC2525 55	SC1585 45	Ankyrin repeat domain-containing protein 24 OS=Homo sapiens GN=ANKRD24 PE=2 SV=2
Q8WVJ2	3	3	30.1427	0	14.9558	SC1247 43	SC1569 44	NudC domain-containing protein 2 OS=Homo sapiens GN=NUDCD2 PE=1 SV=1
Q9BUL8	2	2	18.939	0	57.7183	SC1757 47	SC1247 43	Programmed cell death protein 10 OS=Homo sapiens GN=PDCD10 PE=1 SV=1
Q9BXR6	8	6	54.1993	0	12.4423	SC1569 44	SC2384 54	Complement factor H-related protein 5 OS=Homo sapiens GN=CFHR5 PE=1 SV=1
Q9BYX7	19	11	122.51	0	3.09084	SC1569 44	SC2384 54	Putative beta-actin-like protein 3 OS=Homo sapiens GN=POTEKP PE=5 SV=1
Q9GZV4	4	3	30.1333	0	11.9201	SC1247 43	SC1761 48	Eukaryotic translation initiation factor 5A-2 OS=Homo sapiens GN=EIF5A2 PE=1 SV=3
Q9H169	3	2	21.0507	0	47.2068	SC1585 45	SC2384 54	Stathmin-4 OS=Homo sapiens GN=STMN4 PE=2 SV=1
Q9NSB2	6	5	33.2521	0	33.0153	SC1569 44	SC175 39	Keratin, type II cuticular Hb4 OS=Homo sapiens GN=KRT84 PE=2 SV=2
Q9NVI7;Q5T2N8	4	3	28.1209	0	9.74464	SC1757 47	SC1585 45	ATPase family AAA domain-containing protein 3A OS=Homo sapiens GN=ATAD3A PE=1 SV=2
Q9NWU2	3	2	16.4631	0	8.79728	SC667 42	SC1761 48	Glucose-induced degradation protein 8 homolog OS=Homo sapiens GN=GID8 PE=1 SV=1
Q9NY27	4	3	24.8428	0	7.49862	SC175 39	SC1569 44	Serine/threonine-protein phosphatase 4 regulatory subunit 2 OS=Homo sapiens GN=PPP4R2 PE=1 SV=3
Q9NZP8	13	9	91.2223	0	16.2168	SC1569 44	SC1247 43	Complement C1r subcomponent-like protein OS=Homo sapiens GN=C1RL PE=1 SV=2
Q9P2S2;P58401	10	5	69.3901	0	9.63557	SC1757 47	SC1585 45	Neurexin-2 OS=Homo sapiens GN=NRXN2 PE=2 SV=1
Q9UGM5	21	16	154.113	0	3.10834	SC2525 55	SC1585 45	Fetuin-B OS=Homo sapiens GN=FETUB PE=1 SV=2
Q9UK55	41	28	305.258	0	3.58781	SC1569 44	SC1761 48	Protein Z-dependent protease inhibitor OS=Homo sapiens GN=SERPINA10 PE=1 SV=1
Q9UKK9	2	2	23.6844	0	8.3374	SC667 42	SC2384 54	ADP-sugar pyrophosphatase OS=Homo sapiens GN=NUDT5 PE=1 SV=1
Q9ULB1	9	5	42.3766	0	5.8926	SC1761 48	SC175 39	Neurexin-1 OS=Homo sapiens GN=NRXN1 PE=2 SV=1
Q9Y2H2	3	2	22.7497	0	9.00733	SC1761 48	SC1569 44	Phosphatidylinositide phosphatase SAC2 OS=Homo sapiens GN=INPP5F PE=1 SV=3
Q9Y5I1	2	2	15.9705	0	3.03501	SC115 38	SC383 41	Protocadherin alpha-11 OS=Homo sapiens GN=PCDHA11 PE=2 SV=1
Q9Y399	4	4	21.6013	0	4.60063	SC1569 44	SC2070 51	28S ribosomal protein S2, mitochondrial OS=Homo sapiens GN=MRPS2 PE=1 SV=1
Q86TB3	9	3	51.9039	0	6.52027	SC115 38	SC1761 48	Alpha-protein kinase 2 OS=Homo sapiens GN=ALPK2 PE=2 SV=3
Q86XM0	2	2	9.2219	0	34.4451	SC1585 45	SC2313 53	Cation channel sperm-associated protein subunit delta OS=Homo sapiens GN=CATSPERD PE=1 SV=3
Q96AG4	5	4	28.1067	0	6.55425	SC1761 48	SC2313 53	Leucine-rich repeat-containing protein 59 OS=Homo sapiens GN=LRRC59 PE=1 SV=1
Q96BD8	3	2	20.0922	0	13.0734	SC1757 47	SC175 39	Spindle and kinetochore-associated protein 1 OS=Homo sapiens GN=SKA1 PE=1 SV=1
Q96BN8	3	2	13.3554	0	15.3367	SC1825 50	SC2313 53	Ubiquitin thioesterase otulin OS=Homo sapiens GN=OTULIN PE=1 SV=3
Q96BQ1	6	6	44.3891	0	3.62584	SC1569 44	SC1761 48	Protein FAM3D OS=Homo sapiens GN=FAM3D PE=1 SV=1
Q96DR4	3	2	26.1623	0	61.0124	SC1761 48	SC2525 55	StAR-related lipid transfer protein 4 OS=Homo sapiens GN=STARD4 PE=2 SV=1
Q96IY4	21	17	160.032	0	4.71739	SC383 41	SC1761 48	Carboxypeptidase B2 OS=Homo sapiens GN=CPB2 PE=1 SV=2
Q96KN2	22	16	181.982	0	4.08104	SC2525 55	SC1761 48	Beta-Ala-His dipeptidase OS=Homo sapiens GN=CNDP1 PE=1 SV=4
Q96PD5	51	46	510.523	0	2.76767	SC1768 49	SC115 38	N-acetylmuramoyl-L-alanine amidase OS=Homo sapiens GN=PGLYRP2 PE=1 SV=1
Q96SL4	2	2	9.7514	0	3.67625	SC175 39	SC192 40	Glutathione peroxidase 7 OS=Homo sapiens GN=GPX7 PE=1 SV=1
Q562R1	29	17	207.576	0	5.88026	SC1569 44	SC1585 45	Beta-actin-like protein 2 OS=Homo sapiens GN=ACTBL2 PE=1 SV=2
Q969I3	3	2	18.8598	0	327.021	SC2525 55	SC1761 48	Glycine N-acyltransferase-like protein 1 OS=Homo sapiens GN=GLYATL1 PE=1 SV=1
Q01449	2	2	16.0748	0	21.9914	SC383 41	SC1569 44	Myosin regulatory light chain 2, atrial isoform OS=Homo sapiens GN=MYL7 PE=1 SV=1
Q01469	3	3	25.4007	0	2.97129	SC1585 45	SC1748 46	Fatty acid-binding protein, epidermal OS=Homo sapiens GN=FABP5 PE=1 SV=3
Q02045	6	3	41.3701	0	18.0138	SC1585 45	SC1569 44	Myosin light chain 5 OS=Homo sapiens GN=MYL5 PE=2 SV=1
Q02410	4	2	18.4953	0	22.9341	SC192 40	SC1569 44	Amyloid beta A4 precursor protein-binding family A member 1 OS=Homo sapiens GN=APBA1 PE=1 SV=3
Q02985	14	6	106.201	0	4.93997	SC1569 44	SC383 41	Complement factor H-related protein 3 OS=Homo sapiens GN=CFHR3 PE=1 SV=2
Q03591	23	5	214.243	0	9.976	SC1247 43	SC1585 45	Complement factor H-related protein 1 OS=Homo sapiens GN=CFHR1 PE=1 SV=2
Q04756	13	7	91.0439	0	3.22906	SC1247 43	SC1585 45	Hepatocyte growth factor activator OS=Homo sapiens GN=HGFAC PE=1 SV=1
Q04760	3	3	20.7045	0	23.4429	SC1247 43	SC1585 45	Lactoylglutathione lyase OS=Homo sapiens GN=GLO1 PE=1 SV=4
Q06033	69	58	645.064	0	4.02885	SC1569 44	SC2525 55	Inter-alpha-trypsin inhibitor heavy chain H3 OS=Homo sapiens GN=ITIH3 PE=1 SV=2
Q08380	17	12	106.369	0	9.73834	SC1569 44	SC1761 48	Galectin-3-binding protein OS=Homo sapiens GN=LGALS3BP PE=1 SV=1
Q12805	27	19	217.937	0	3.28442	SC1569 44	SC1585 45	EGF-containing fibulin-like extracellular matrix protein 1 OS=Homo sapiens GN=EFEMP1 PE=1 SV=2
Q13790	22	18	133.422	0	2.67669	SC1569 44	SC1761 48	Apolipoprotein F OS=Homo sapiens GN=APOF PE=1 SV=2
Q14520	38	27	298.926	0	1.96051	SC1761 48	SC1247 43	Hyaluronan-binding protein 2 OS=Homo sapiens GN=HABP2 PE=1 SV=1
Q14624	103	86	877.986	0	1.82654	SC1768 49	SC2525 55	Inter-alpha-trypsin inhibitor heavy chain H4 OS=Homo sapiens GN=ITIH4 PE=1 SV=4
Q15485	8	4	57.456	0	3.61692	SC1247 43	SC1761 48	Ficolin-2 OS=Homo sapiens GN=FCN2 PE=1 SV=2
Q15582	9	7	58.938	0	5.3261	SC1569 44	SC1585 45	Transforming growth factor-beta-induced protein ig-h3 OS=Homo sapiens GN=TGFBI PE=1 SV=1
Q15848	4	2	37.7128	0	9.42264	SC192 40	SC1569 44	Adiponectin OS=Homo sapiens GN=ADIPOQ PE=1 SV=1
Q16610	25	22	161.461	0	1.60107	SC1768 49	SC1569 44	Extracellular matrix protein 1 OS=Homo sapiens GN=ECM1 PE=1 SV=2
Q92496	8	4	59.6727	0	20.9013	SC1761 48	SC1569 44	Complement factor H-related protein 4 OS=Homo sapiens GN=CFHR4 PE=1 SV=3
Q99814	6	3	48.8895	0	14.8625	SC1569 44	SC1761 48	Endothelial PAS domain-containing protein 1 OS=Homo sapiens GN=EPAS1 PE=1 SV=3
P55058	5	4	30.7947	1.11022e-16	3.60309	SC1757 47	SC1585 45	Phospholipid transfer protein OS=Homo sapiens GN=PLTP PE=1 SV=1
P10909	61	45	556.94	2.22045e-16	2.05606	SC1585 45	SC1569 44	Clusterin OS=Homo sapiens GN=CLU PE=1 SV=1
Q5JQF8	4	2	22.0469	2.22045e-16	4.82631	SC1761 48	SC1569 44	Polyadenylate-binding protein 1-like 2 OS=Homo sapiens GN=PABPC1L2A PE=2 SV=1
Q58FF6	4	2	27.1061	2.22045e-16	7.41667	SC1757 47	SC175 39	Putative heat shock protein HSP 90-beta 4 OS=Homo sapiens GN=HSP90AB4P PE=5 SV=1
Q9Y6K1	5	3	40.7974	5.55112e-16	2.38113	SC1748 46	SC1761 48	DNA (cytosine-5)-methyltransferase 3A OS=Homo sapiens GN=DNMT3A PE=1 SV=4
O43719	9	5	48.4211	6.66134e-16	6.25895	SC175 39	SC1761 48	HIV Tat-specific factor 1 OS=Homo sapiens GN=HTATSF1 PE=1 SV=1
P04070	21	19	171.816	6.66134e-16	1.51545	SC1768 49	SC1761 48	Vitamin K-dependent protein C OS=Homo sapiens GN=PROC PE=1 SV=1
Q15102	5	4	32.45	1.33227e-15	6.26615	SC2271 52	SC1247 43	Platelet-activating factor acetylhydrolase IB subunit gamma OS=Homo sapiens GN=PAFAH1B3 PE=1 SV=1
P01138	3	2	22.4805	1.77636e-15	3.00685	SC1569 44	SC1761 48	Beta-nerve growth factor OS=Homo sapiens GN=NGF PE=1 SV=3
P24592	5	3	30.3218	2.10942e-15	12.7749	SC2313 53	SC1761 48	Insulin-like growth factor-binding protein 6 OS=Homo sapiens GN=IGFBP6 PE=1 SV=1
Q6NS38	7	2	50.9942	2.10942e-15	2.7478	SC1761 48	SC1247 43	DNA oxidative demethylase ALKBH2 OS=Homo sapiens GN=ALKBH2 PE=1 SV=1
P20851	22	18	169.571	1.03251e-14	3.23241	SC2313 53	SC383 41	C4b-binding protein beta chain OS=Homo sapiens GN=C4BPB PE=1 SV=1
P05156	72	57	601.279	1.12133e-14	1.4254	SC2613 56	SC383 41	Complement factor I OS=Homo sapiens GN=CFI PE=1 SV=2
A5A3E0	40	4	283.337	1.88738e-14	2.9002	SC2525 55	SC1761 48	POTE ankyrin domain family member F OS=Homo sapiens GN=POTEF PE=1 SV=2
P00742	25	18	183.39	2.34257e-14	1.50109	SC1768 49	SC1761 48	Coagulation factor X OS=Homo sapiens GN=F10 PE=1 SV=2
Q9UL58	3	2	15.1066	3.39728e-14	10.335	SC192 40	SC2313 53	Zinc finger protein 215 OS=Homo sapiens GN=ZNF215 PE=2 SV=2
Q8IVU3	4	3	21.3874	4.35207e-14	5.0782	SC2525 55	SC115 38	Probable E3 ubiquitin-protein ligase HERC6 OS=Homo sapiens GN=HERC6 PE=2 SV=2
Q9NRW3	2	2	11.1461	5.60663e-14	11.5841	SC1247 43	SC1585 45	DNA dC->dU-editing enzyme APOBEC-3C OS=Homo sapiens GN=APOBEC3C PE=1 SV=2
Q9P217	6	3	42.8899	9.62563e-14	3.82087	SC192 40	SC1585 45	Zinc finger SWIM domain-containing protein 5 OS=Homo sapiens GN=ZSWIM5 PE=2 SV=2
Q8IVL8	4	3	26.9044	1.15019e-13	2.62703	SC115 38	SC2384 54	Carboxypeptidase O OS=Homo sapiens GN=CPO PE=2 SV=1
P06681	60	50	537.387	2.12941e-13	1.55174	SC667 42	SC2525 55	Complement C2 OS=Homo sapiens GN=C2 PE=1 SV=2
P01033	2	2	17.1201	3.06311e-13	18.6675	SC667 42	SC175 39	Metalloproteinase inhibitor 1 OS=Homo sapiens GN=TIMP1 PE=1 SV=1
O95219	6	5	38.0205	3.79141e-13	2.44506	SC1247 43	SC2313 53	Sorting nexin-4 OS=Homo sapiens GN=SNX4 PE=1 SV=1
Q8N8P7	2	2	11.1889	5.29021e-13	18.258	SC1569 44	SC115 38	Uncharacterized protein C11orf44 OS=Homo sapiens GN=C11orf44 PE=2 SV=1
O95445	10	7	80.9006	6.00409e-13	2.65075	SC192 40	SC1569 44	Apolipoprotein M OS=Homo sapiens GN=APOM PE=1 SV=2
P41222	7	2	43.4657	7.25087e-13	2.736	SC667 42	SC175 39	Prostaglandin-H2 D-isomerase OS=Homo sapiens GN=PTGDS PE=1 SV=1
P27918	24	16	199.572	8.74634e-13	1.64693	SC2525 55	SC2070 51	Properdin OS=Homo sapiens GN=CFP PE=1 SV=2
Q96H20	3	2	20.6099	9.92983e-13	8.84734	SC1768 49	SC115 38	Vacuolar-sorting protein SNF8 OS=Homo sapiens GN=SNF8 PE=1 SV=1
O95497	2	2	18.3626	2.03715e-12	1063.32	SC1247 43	SC2313 53	Pantetheinase OS=Homo sapiens GN=VNN1 PE=1 SV=2
A8MWE9	2	2	11.3248	2.12463e-12	11.7889	SC192 40	SC1585 45	EF-hand calcium-binding domain-containing protein 8 OS=Homo sapiens GN=EFCAB8 PE=3 SV=2
Q92954	14	13	91.9506	2.22289e-12	1.69144	SC1768 49	SC2384 54	Proteoglycan 4 OS=Homo sapiens GN=PRG4 PE=1 SV=2
P07357	61	53	570.263	2.3662e-11	1.70635	SC1247 43	SC2525 55	Complement component C8 alpha chain OS=Homo sapiens GN=C8A PE=1 SV=2
P07737	5	4	27.054	5.48297e-11	8.4405	SC2271 52	SC2384 54	Profilin-1 OS=Homo sapiens GN=PFN1 PE=1 SV=2
P00740	46	37	352.249	5.79773e-11	1.39912	SC1247 43	SC2384 54	Coagulation factor IX OS=Homo sapiens GN=F9 PE=1 SV=2
Q96LZ3	4	3	22.7077	6.62974e-11	17.6186	SC383 41	SC1247 43	Calcineurin subunit B type 2 OS=Homo sapiens GN=PPP3R2 PE=1 SV=3
Q13111	4	3	24.441	1.04838e-10	5.14775	SC667 42	SC2313 53	Chromatin assembly factor 1 subunit A OS=Homo sapiens GN=CHAF1A PE=1 SV=2
Q8TED9	3	2	17.7601	2.79175e-10	5.35684	SC2525 55	SC1761 48	Actin filament-associated protein 1-like 1 OS=Homo sapiens GN=AFAP1L1 PE=1 SV=2
P63104	2	2	11.0482	3.39638e-10	91.9798	SC1569 44	SC2313 53	14-3-3 protein zeta/delta OS=Homo sapiens GN=YWHAZ PE=1 SV=1
P11226	7	7	50.1573	1.23471e-09	2.68478	SC2313 53	SC1247 43	Mannose-binding protein C OS=Homo sapiens GN=MBL2 PE=1 SV=2
P40197	4	3	34.2674	1.86525e-09	2.14479	SC1761 48	SC192 40	Platelet glycoprotein V OS=Homo sapiens GN=GP5 PE=1 SV=1
O76011	2	2	10.2982	5.78025e-08	2.22632	SC1569 44	SC175 39	Keratin, type I cuticular Ha4 OS=Homo sapiens GN=KRT34 PE=2 SV=2
