# Supplementary material for: Colorectal cancer patients with different C-reactive protein levels and 5-year survival times can be differentiated with quantitative serum proteomics
Source: PLoS One. 2018 Apr 9;13(4):e0195354. doi: 10.1371/journal.pone.0195354 (PMC5891022; doi:10.1371/journal.pone.0195354)
Supplement: S3 Table — Accession, peptide count, unique peptides, confidence score, ANOVA p-value, maximum fold change and highest and lowest mean condition as well as the full protein name are given in the table. (XLSX) [file pone.0195354.s003.xlsx]

## Sheet: Sheet1
Accession	Peptide count	Unique peptides	Confidence score	Anova (p)	Max fold change	Highest mean condition	Lowest mean condition	Description
P18065	5	5	33.0439	6.31127e-05	2.41148	CRP >30	CRP < 30	Insulin-like growth factor-binding protein 2 OS=Homo sapiens GN=IGFBP2 PE=1 SV=2
P35372	2	2	11.3036	8.94234e-05	6.73945	CRP >30	CRP < 30	Mu-type opioid receptor OS=Homo sapiens GN=OPRM1 PE=1 SV=2
P02741	3	2	29.3015	0.000122628	2.84889	CRP >30	CRP < 30	C-reactive protein OS=Homo sapiens GN=CRP PE=1 SV=1
P0DJI8	30	19	189.205	0.000380854	5.22112	CRP >30	CRP < 30	Serum amyloid A-1 protein OS=Homo sapiens GN=SAA1 PE=1 SV=1
Q96PD5	51	46	510.523	0.000633028	1.53716	CRP < 30	CRP >30	N-acetylmuramoyl-L-alanine amidase OS=Homo sapiens GN=PGLYRP2 PE=1 SV=1
P02655	9	8	116.169	0.000684848	3.42811	CRP < 30	CRP >30	Apolipoprotein C-II OS=Homo sapiens GN=APOC2 PE=1 SV=1
Q8WVJ2	3	3	30.1427	0.00115019	2.98849	CRP < 30	CRP >30	NudC domain-containing protein 2 OS=Homo sapiens GN=NUDCD2 PE=1 SV=1
P08887	2	2	9.5939	0.00130519	4.47895	CRP >30	CRP < 30	Interleukin-6 receptor subunit alpha OS=Homo sapiens GN=IL6R PE=1 SV=1
Q9Y5I1	2	2	15.9705	0.00147121	1.56432	CRP >30	CRP < 30	Protocadherin alpha-11 OS=Homo sapiens GN=PCDHA11 PE=2 SV=1
P78380	2	2	9.2537	0.00158215	4.02757	CRP >30	CRP < 30	Oxidized low-density lipoprotein receptor 1 OS=Homo sapiens GN=OLR1 PE=1 SV=1
Q9Y6K1	5	3	40.7974	0.00173922	1.35022	CRP < 30	CRP >30	DNA (cytosine-5)-methyltransferase 3A OS=Homo sapiens GN=DNMT3A PE=1 SV=4
P42081	3	2	15.3184	0.00235892	1.66466	CRP < 30	CRP >30	T-lymphocyte activation antigen CD86 OS=Homo sapiens GN=CD86 PE=1 SV=2
Q6ZSA8	2	2	16.4398	0.00291728	3.53071	CRP >30	CRP < 30	Putative uncharacterized protein FLJ45684 OS=Homo sapiens PE=5 SV=2
P07225	61	49	549.231	0.00304593	1.28316	CRP >30	CRP < 30	Vitamin K-dependent protein S OS=Homo sapiens GN=PROS1 PE=1 SV=1
P37088	5	5	39.7374	0.00333073	3.29469	CRP >30	CRP < 30	Amiloride-sensitive sodium channel subunit alpha OS=Homo sapiens GN=SCNN1A PE=1 SV=1
P04180	9	9	52.5074	0.00380091	1.45219	CRP < 30	CRP >30	Phosphatidylcholine-sterol acyltransferase OS=Homo sapiens GN=LCAT PE=1 SV=1
P00734	103	78	785.298	0.0039202	1.23945	CRP < 30	CRP >30	Prothrombin OS=Homo sapiens GN=F2 PE=1 SV=2
P19823	115	97	858.093	0.00416716	1.58544	CRP < 30	CRP >30	Inter-alpha-trypsin inhibitor heavy chain H2 OS=Homo sapiens GN=ITIH2 PE=1 SV=2
P08294	3	3	21.8205	0.00417024	2.68244	CRP < 30	CRP >30	Extracellular superoxide dismutase [Cu-Zn] OS=Homo sapiens GN=SOD3 PE=1 SV=2
P15169	26	21	248.707	0.00441206	1.62186	CRP >30	CRP < 30	Carboxypeptidase N catalytic chain OS=Homo sapiens GN=CPN1 PE=1 SV=1
P02760	67	55	561.01	0.00463279	1.18543	CRP < 30	CRP >30	Protein AMBP OS=Homo sapiens GN=AMBP PE=1 SV=1
O14986	7	7	48.016	0.0047016	1.6083	CRP < 30	CRP >30	Phosphatidylinositol 4-phosphate 5-kinase type-1 beta OS=Homo sapiens GN=PIP5K1B PE=1 SV=2
Q8ND56	3	3	22.7715	0.00486133	1.94556	CRP < 30	CRP >30	Protein LSM14 homolog A OS=Homo sapiens GN=LSM14A PE=1 SV=3
Q02985	14	6	106.201	0.00513383	1.80226	CRP >30	CRP < 30	Complement factor H-related protein 3 OS=Homo sapiens GN=CFHR3 PE=1 SV=2
P02750	42	34	358.936	0.00770478	2.11878	CRP >30	CRP < 30	Leucine-rich alpha-2-glycoprotein OS=Homo sapiens GN=LRG1 PE=1 SV=2
O43866	6	5	39.2257	0.00772497	1.57616	CRP < 30	CRP >30	CD5 antigen-like OS=Homo sapiens GN=CD5L PE=1 SV=1
P02656	24	21	150.215	0.00907812	1.48851	CRP < 30	CRP >30	Apolipoprotein C-III OS=Homo sapiens GN=APOC3 PE=1 SV=1
P27169	22	18	280.854	0.00925198	1.67734	CRP < 30	CRP >30	Serum paraoxonase/arylesterase 1 OS=Homo sapiens GN=PON1 PE=1 SV=3
P01011	77	66	641.472	0.00959342	2.35019	CRP >30	CRP < 30	Alpha-1-antichymotrypsin OS=Homo sapiens GN=SERPINA3 PE=1 SV=2
P19827	88	74	779.158	0.00966637	1.44724	CRP < 30	CRP >30	Inter-alpha-trypsin inhibitor heavy chain H1 OS=Homo sapiens GN=ITIH1 PE=1 SV=3
P0C1Z6	3	3	17.1031	0.0104193	5.14065	CRP < 30	CRP >30	TCF3 fusion partner OS=Homo sapiens GN=TFPT PE=1 SV=1
P22891	10	9	68.8271	0.011387	1.67829	CRP < 30	CRP >30	Vitamin K-dependent protein Z OS=Homo sapiens GN=PROZ PE=1 SV=2
O75794	5	4	35.0304	0.0114216	3.65406	CRP < 30	CRP >30	Cell division cycle protein 123 homolog OS=Homo sapiens GN=CDC123 PE=1 SV=1
P02765	69	57	384.808	0.0115374	1.38987	CRP < 30	CRP >30	Alpha-2-HS-glycoprotein OS=Homo sapiens GN=AHSG PE=1 SV=1
Q96BN8	3	2	13.3554	0.0139274	2.03618	CRP < 30	CRP >30	Ubiquitin thioesterase otulin OS=Homo sapiens GN=OTULIN PE=1 SV=3
P03952	57	48	544.954	0.0140457	1.24305	CRP < 30	CRP >30	Plasma kallikrein OS=Homo sapiens GN=KLKB1 PE=1 SV=1
P02766	21	19	205.229	0.014957	1.48157	CRP < 30	CRP >30	Transthyretin OS=Homo sapiens GN=TTR PE=1 SV=1
O95445	10	7	80.9006	0.0151791	1.31454	CRP < 30	CRP >30	Apolipoprotein M OS=Homo sapiens GN=APOM PE=1 SV=2
Q96KN2	22	16	181.982	0.016254	1.54501	CRP < 30	CRP >30	Beta-Ala-His dipeptidase OS=Homo sapiens GN=CNDP1 PE=1 SV=4
P10909	61	45	556.94	0.0163512	1.23164	CRP < 30	CRP >30	Clusterin OS=Homo sapiens GN=CLU PE=1 SV=1
P0DJI9	18	7	123.055	0.016579	2.50438	CRP >30	CRP < 30	Serum amyloid A-2 protein OS=Homo sapiens GN=SAA2 PE=1 SV=1
P14920	5	2	41.8362	0.0167194	2.45596	CRP >30	CRP < 30	D-amino-acid oxidase OS=Homo sapiens GN=DAO PE=1 SV=3
P05543	30	23	251.326	0.0169674	1.44843	CRP >30	CRP < 30	Thyroxine-binding globulin OS=Homo sapiens GN=SERPINA7 PE=1 SV=2
Q01449	2	2	16.0748	0.0197127	1.9539	CRP < 30	CRP >30	Myosin regulatory light chain 2, atrial isoform OS=Homo sapiens GN=MYL7 PE=1 SV=1
Q9P2S2;P58401	10	5	69.3901	0.0201602	2.13194	CRP >30	CRP < 30	Neurexin-2 OS=Homo sapiens GN=NRXN2 PE=2 SV=1
P06396	82	68	797.763	0.020509	1.33667	CRP < 30	CRP >30	Gelsolin OS=Homo sapiens GN=GSN PE=1 SV=1
P14902	4	3	22.5121	0.0205385	1.52981	CRP < 30	CRP >30	Indoleamine 2,3-dioxygenase 1 OS=Homo sapiens GN=IDO1 PE=1 SV=1
Q9NWU2	3	2	16.4631	0.0206989	2.17051	CRP < 30	CRP >30	Glucose-induced degradation protein 8 homolog OS=Homo sapiens GN=GID8 PE=1 SV=1
Q9NSB2	6	5	33.2521	0.0221653	3.75571	CRP >30	CRP < 30	Keratin, type II cuticular Hb4 OS=Homo sapiens GN=KRT84 PE=2 SV=2
P25311	25	20	176.49	0.0222093	1.24764	CRP < 30	CRP >30	Zinc-alpha-2-glycoprotein OS=Homo sapiens GN=AZGP1 PE=1 SV=2
P80108	15	11	103.692	0.0222247	1.68028	CRP >30	CRP < 30	Phosphatidylinositol-glycan-specific phospholipase D OS=Homo sapiens GN=GPLD1 PE=1 SV=3
P55058	5	4	30.7947	0.0236607	1.45209	CRP >30	CRP < 30	Phospholipid transfer protein OS=Homo sapiens GN=PLTP PE=1 SV=1
P00740	46	37	352.249	0.0270732	1.1448	CRP < 30	CRP >30	Coagulation factor IX OS=Homo sapiens GN=F9 PE=1 SV=2
P20851	22	18	169.571	0.0301098	1.35798	CRP >30	CRP < 30	C4b-binding protein beta chain OS=Homo sapiens GN=C4BPB PE=1 SV=1
P43251	24	22	180.181	0.0328656	1.20675	CRP < 30	CRP >30	Biotinidase OS=Homo sapiens GN=BTD PE=1 SV=2
Q16610	25	22	161.461	0.0338829	1.16095	CRP < 30	CRP >30	Extracellular matrix protein 1 OS=Homo sapiens GN=ECM1 PE=1 SV=2
P03951	23	22	162.913	0.0339399	1.29095	CRP < 30	CRP >30	Coagulation factor XI OS=Homo sapiens GN=F11 PE=1 SV=1
Q562R1	29	17	207.576	0.0346076	1.73979	CRP >30	CRP < 30	Beta-actin-like protein 2 OS=Homo sapiens GN=ACTBL2 PE=1 SV=2
Q02045	6	3	41.3701	0.0350218	1.5716	CRP < 30	CRP >30	Myosin light chain 5 OS=Homo sapiens GN=MYL5 PE=2 SV=1
P01033	2	2	17.1201	0.0351185	2.16661	CRP < 30	CRP >30	Metalloproteinase inhibitor 1 OS=Homo sapiens GN=TIMP1 PE=1 SV=1
Q9NZP8	13	9	91.2223	0.0356077	1.74821	CRP >30	CRP < 30	Complement C1r subcomponent-like protein OS=Homo sapiens GN=C1RL PE=1 SV=2
Q8IVU3	4	3	21.3874	0.0383996	1.54155	CRP < 30	CRP >30	Probable E3 ubiquitin-protein ligase HERC6 OS=Homo sapiens GN=HERC6 PE=2 SV=2
P08603	124	96	1184.66	0.038672	1.32504	CRP >30	CRP < 30	Complement factor H OS=Homo sapiens GN=CFH PE=1 SV=4
P26927	46	35	358.764	0.0389583	1.67221	CRP >30	CRP < 30	Hepatocyte growth factor-like protein OS=Homo sapiens GN=MST1 PE=1 SV=2
P08697	36	33	377.718	0.0414306	1.23847	CRP < 30	CRP >30	Alpha-2-antiplasmin OS=Homo sapiens GN=SERPINF2 PE=1 SV=3
P02649	46	39	392.909	0.0420535	1.38633	CRP < 30	CRP >30	Apolipoprotein E OS=Homo sapiens GN=APOE PE=1 SV=1
P27918	24	16	199.572	0.0435481	1.15906	CRP < 30	CRP >30	Properdin OS=Homo sapiens GN=CFP PE=1 SV=2
P22352	23	16	160.859	0.0438969	1.3534	CRP < 30	CRP >30	Glutathione peroxidase 3 OS=Homo sapiens GN=GPX3 PE=1 SV=2
P49908	13	8	95.937	0.0456344	1.26971	CRP < 30	CRP >30	Selenoprotein P OS=Homo sapiens GN=SEPP1 PE=1 SV=3
P13796	16	10	105.543	0.0480858	1.28145	CRP < 30	CRP >30	Plastin-2 OS=Homo sapiens GN=LCP1 PE=1 SV=6
P04278	26	23	259.765	0.048412	1.86387	CRP < 30	CRP >30	Sex hormone-binding globulin OS=Homo sapiens GN=SHBG PE=1 SV=2
