# Supplementary material for: Colorectal cancer patients with different C-reactive protein levels and 5-year survival times can be differentiated with quantitative serum proteomics
Source: PLoS One. 2018 Apr 9;13(4):e0195354. doi: 10.1371/journal.pone.0195354 (PMC5891022; doi:10.1371/journal.pone.0195354)
Supplement: S4 Table — Accession, peptide count, unique peptides, confidence score, ANOVA p-value, maximum fold change and highest and lowest mean condition as well as the full protein name are given in the table. (XLSX) [file pone.0195354.s004.xlsx]

## Sheet: PROTEIN TABLE 11 Survival Categ
Accession	Peptide count	Unique peptides	Confidence score	Anova (p)	Max fold change	Highest mean condition	Lowest mean condition	Description
P02750	42	34	358.936	0.00191756	2.23093	Survival < 5 a	Survival > 5 a	Leucine-rich alpha-2-glycoprotein OS=Homo sapiens GN=LRG1 PE=1 SV=2
P00747	148	118	1396.06	0.00417768	1.28097	Survival > 5 a	Survival < 5 a	Plasminogen OS=Homo sapiens GN=PLG PE=1 SV=2
P02656	24	21	150.215	0.00491499	1.48284	Survival > 5 a	Survival < 5 a	Apolipoprotein C-III OS=Homo sapiens GN=APOC3 PE=1 SV=1
P05452	23	17	245.354	0.00502381	1.51382	Survival > 5 a	Survival < 5 a	Tetranectin OS=Homo sapiens GN=CLEC3B PE=1 SV=3
P42081	3	2	15.3184	0.00899345	1.52034	Survival > 5 a	Survival < 5 a	T-lymphocyte activation antigen CD86 OS=Homo sapiens GN=CD86 PE=1 SV=2
Q6ZS52	2	2	10.5358	0.0109464	2.05003	Survival < 5 a	Survival > 5 a	Putative uncharacterized protein FLJ45825 OS=Homo sapiens PE=5 SV=1
P78380	2	2	9.2537	0.0115254	3.30566	Survival < 5 a	Survival > 5 a	Oxidized low-density lipoprotein receptor 1 OS=Homo sapiens GN=OLR1 PE=1 SV=1
Q96BN8	3	2	13.3554	0.0129653	1.7014	Survival > 5 a	Survival < 5 a	Ubiquitin thioesterase otulin OS=Homo sapiens GN=OTULIN PE=1 SV=3
O14986	7	7	48.016	0.0155465	1.48262	Survival > 5 a	Survival < 5 a	Phosphatidylinositol 4-phosphate 5-kinase type-1 beta OS=Homo sapiens GN=PIP5K1B PE=1 SV=2
P49908	13	8	95.937	0.0186146	1.32382	Survival > 5 a	Survival < 5 a	Selenoprotein P OS=Homo sapiens GN=SEPP1 PE=1 SV=3
P00734	103	78	785.298	0.0209305	1.18934	Survival > 5 a	Survival < 5 a	Prothrombin OS=Homo sapiens GN=F2 PE=1 SV=2
P02655	9	8	116.169	0.0214894	2.24566	Survival > 5 a	Survival < 5 a	Apolipoprotein C-II OS=Homo sapiens GN=APOC2 PE=1 SV=1
P35527	15	13	108.065	0.0225896	1.67226	Survival < 5 a	Survival > 5 a	Keratin, type I cytoskeletal 9 OS=Homo sapiens GN=KRT9 PE=1 SV=3
P02741	3	2	29.3015	0.0233837	2.08431	Survival < 5 a	Survival > 5 a	C-reactive protein OS=Homo sapiens GN=CRP PE=1 SV=1
P15169	26	21	248.707	0.0235583	1.51327	Survival < 5 a	Survival > 5 a	Carboxypeptidase N catalytic chain OS=Homo sapiens GN=CPN1 PE=1 SV=1
P01042	68	58	697.721	0.0275588	1.114	Survival > 5 a	Survival < 5 a	Kininogen-1 OS=Homo sapiens GN=KNG1 PE=1 SV=2
P24385	2	2	18.8602	0.0302269	1.46726	Survival > 5 a	Survival < 5 a	G1/S-specific cyclin-D1 OS=Homo sapiens GN=CCND1 PE=1 SV=1
P29622	2	2	13.2682	0.0324943	1.77091	Survival > 5 a	Survival < 5 a	Kallistatin OS=Homo sapiens GN=SERPINA4 PE=1 SV=3
Q02410	4	2	18.4953	0.0330698	1.68496	Survival > 5 a	Survival < 5 a	Amyloid beta A4 precursor protein-binding family A member 1 OS=Homo sapiens GN=APBA1 PE=1 SV=3
P10909	61	45	556.94	0.0345054	1.19301	Survival > 5 a	Survival < 5 a	Clusterin OS=Homo sapiens GN=CLU PE=1 SV=1
P02654	9	5	60.5018	0.0345667	2.04485	Survival < 5 a	Survival > 5 a	Apolipoprotein C-I OS=Homo sapiens GN=APOC1 PE=1 SV=1
P35372	2	2	11.3036	0.0359299	3.13138	Survival < 5 a	Survival > 5 a	Mu-type opioid receptor OS=Homo sapiens GN=OPRM1 PE=1 SV=2
P22891	10	9	68.8271	0.0413377	1.53807	Survival > 5 a	Survival < 5 a	Vitamin K-dependent protein Z OS=Homo sapiens GN=PROZ PE=1 SV=2
P37088	5	5	39.7374	0.0425581	2.39386	Survival < 5 a	Survival > 5 a	Amiloride-sensitive sodium channel subunit alpha OS=Homo sapiens GN=SCNN1A PE=1 SV=1
P16619	3	3	22.3958	0.0446536	1.8587	Survival < 5 a	Survival > 5 a	C-C motif chemokine 3-like 1 OS=Homo sapiens GN=CCL3L1 PE=1 SV=1
Q9NY27	4	3	24.8428	0.0452981	1.56783	Survival > 5 a	Survival < 5 a	Serine/threonine-protein phosphatase 4 regulatory subunit 2 OS=Homo sapiens GN=PPP4R2 PE=1 SV=3
P02766	21	19	205.229	0.0454235	1.34992	Survival > 5 a	Survival < 5 a	Transthyretin OS=Homo sapiens GN=TTR PE=1 SV=1
Q96PD5	51	46	510.523	0.045591	1.28648	Survival > 5 a	Survival < 5 a	N-acetylmuramoyl-L-alanine amidase OS=Homo sapiens GN=PGLYRP2 PE=1 SV=1
Q6ZSA8	2	2	16.4398	0.0484936	2.53608	Survival < 5 a	Survival > 5 a	Putative uncharacterized protein FLJ45684 OS=Homo sapiens PE=5 SV=2
O75348	3	2	21.6388	0.0486071	1.46323	Survival > 5 a	Survival < 5 a	V-type proton ATPase subunit G 1 OS=Homo sapiens GN=ATP6V1G1 PE=1 SV=3
P08887	2	2	9.5939	0.0491851	3.00277	Survival < 5 a	Survival > 5 a	Interleukin-6 receptor subunit alpha OS=Homo sapiens GN=IL6R PE=1 SV=1
