# Supplementary material for: Colorectal cancer patients with different C-reactive protein levels and 5-year survival times can be differentiated with quantitative serum proteomics
Source: PLoS One. 2018 Apr 9;13(4):e0195354. doi: 10.1371/journal.pone.0195354 (PMC5891022; doi:10.1371/journal.pone.0195354)
Supplement: S6 Table — Only proteins passing the cut-off of 0.05 for ANOVA were used. (XLS) [file pone.0195354.s006.xls]

## Sheet: Sheet0
© 2000-2017 QIAGEN. All rights reserved.
ID	Analysis	Molecules in Network	Score	Focus Molecules	Top Diseases and Functions
1	CRP Categories 2 Anova passing proteins - 2017-09-11 11:22 AM	AHSG,Alpha 1 antitrypsin,AMBP,APOC2,APOC3,APOM,CFH,chymotrypsin,coagulation factor,ERK1/2,F9,F11,FXR ligand-FXR-Retinoic acid-RXRα,HDL,HDL-cholesterol,Iti,ITIH1,ITIH2,Kallikrein,KLKB1,LCAT,MST1,Nos,Nr1h,PLTP,PON1,SAA,SAA1,SAA2,SERPINA3,SERPINA7,SERPINF2,Tcf 1/3/4,TTR,VLDL-cholesterol	47	21	Lipid Metabolism, Molecular Transport, Small Molecule Biochemistry
2	CRP Categories 2 Anova passing proteins - 2017-09-11 11:22 AM	Akt,ALT,AZGP1,C4BP,C4BPB,Collagen Alpha1,Collagen type I,Collagen(s),CPN1,CRP,F2,Fibrin,Fibrinogen,GPLD1,Growth hormone,GSN,IGFBP2,Integrin,Laminin,LCP1,Ldh (complex),LDL,LDL-cholesterol,LRG1,NADPH oxidase,OLR1,Pdgf (complex),PIP5K1B,PLA2,Pld,PROS1,PROZ,Sod,SOD3,SYK/ZAP	30	15	Hematological System Development and Function, Organismal Functions, Protein Degradation
3	CRP Categories 2 Anova passing proteins - 2017-09-11 11:22 AM	ACTBL2,AP1M2,APP,ARC,ARF4,BTD,C3,C1RL,C1S,C4orf46,CD84,CD5L,CDC123,CFH,CFHR3,CFP,CNDP1,CNTNAP1,Complement component 1,CSF2,CUL3,DYNC1LI2,EAF1,ERBB3,FBXO6,FPR2,HABP2,IGF1R,KRT84,MRC1,OLR1,PCDHA11,PIK3R5,SDCCAG3,TFPT	25	13	Cell-To-Cell Signaling and Interaction, Free Radical Scavenging, Molecular Transport
4	CRP Categories 2 Anova passing proteins - 2017-09-11 11:22 AM	Ap1,APOE,CD86,CLU,ECM1,GOT,GPX3,HERC6,Hsp27,IDO1,Ifn,Iga,IgG,Igm,IL1,IL12 (complex),IL12 (family),IL6R,Immunoglobulin,Interferon alpha,Jnk,Mek,NCOR-LXR-Oxysterol-RXR-9 cis RA,NFAT (complex),NFkB (complex),OTULIN,PDGF BB,Pro-inflammatory Cytokine,Serine Protease,SHBG,TCF,Tgf beta,TIMP1,Tnf (family),trypsin	20	11	Cell-To-Cell Signaling and Interaction, Cellular Growth and Proliferation, Connective Tissue Disorders
5	CRP Categories 2 Anova passing proteins - 2017-09-11 11:22 AM	Alpha catenin,caspase,CD3,Cg,chemokine,DNMT3A,ERK,F Actin,FSH,Histone h3,Histone h4,Hsp70,Insulin,Mapk,Mlc,MYL5,MYL7,Myosin,NRXN2,OPRM1,P38 MAPK,p70 S6k,p85 (pik3r),PGLYRP2,PI3K (complex),Pka,Pkc(s),Proinsulin,Rac,SCNN1A,SELENOP,STAT,TCR,Vegf,voltage-gated calcium channel	14	8	Behavior, Respiratory Disease, Organismal Functions
6	CRP Categories 2 Anova passing proteins - 2017-09-11 11:22 AM	ARF4,ARF5,ARMC8,ATP6V1A,CCDC51,DAO,DYNC1LI2,ELAVL1,GID4,GID8,HLA-DPB1,LSM14A,MAEA,MAML1,MGST3,MKLN1,NAPB,NDUFA5,NDUFB8,NDUFC2,NUDCD2,PURB,RANBP10,RMND5A,RMND5B,SEC22B,SECISBP2L,SFXN1,SFXN3,STOML2,STX7,TDGF1,WSB2,YPEL5,ZMYND19	6	4	Cellular Assembly and Organization, Cell-To-Cell Signaling and Interaction, Hematological System Development and Function
