# Supplementary material for: Colorectal cancer patients with different C-reactive protein levels and 5-year survival times can be differentiated with quantitative serum proteomics
Source: PLoS One. 2018 Apr 9;13(4):e0195354. doi: 10.1371/journal.pone.0195354 (PMC5891022; doi:10.1371/journal.pone.0195354)
Supplement: S8 Table — Only proteins passing the cut-off of 0.05 for ANOVA were used. (XLS) [file pone.0195354.s008.xls]

## Sheet: Sheet0
© 2000-2017 QIAGEN. All rights reserved.
ID	Analysis	Molecules in Network	Score	Focus Molecules	Top Diseases and Functions
1	Survival 5a cut off Anova passing proteins - 2017-09-11 11:25 AM	Alpha 1 antitrypsin,APOC1,APOC2,APOC3,CD86,CLEC3B,CLU,Collagen Alpha1,Collagen type VI,Collagen(s),CPN1,CRP,ERK1/2,Fibrin,Fibrinogen,Growth hormone,HDL,HDL-cholesterol,Histone h4,IL6R,Kallikrein,KNG1,LDL,LDL-cholesterol,LRG1,Mlc,N-cor,Nr1h,OLR1,PLG,Pro-inflammatory Cytokine,PROZ,SERPINA4,TTR,VLDL-cholesterol	41	16	Metabolic Disease, Neurological Disease, Organismal Injury and Abnormalities
2	Survival 5a cut off Anova passing proteins - 2017-09-11 11:25 AM	Androgen-AR,APP,ATP6V1G1,B3GNT5,Calmodulin,CAMK2N2,CCL7,chemokine,DOK5,FAM133B,HECW1,Histone h3,IgG,IL12 (complex),Insulin,LY86,Mapk,mir-103,miR-103-3p (and other miRNAs w/seed GCAGCAU),miR-191-5p (and other miRNAs w/seed AACGGAA),NFkB (complex),opioid receptor,OTULIN,PGLYRP2,PPP4R2,SCNN1A,SELENOP,SERP1,SERPINA4,SLC2A12,STAT,TBC1D4,TMEM27,TP53,Vegf	14	7	Cell Death and Survival, Cellular Compromise, Connective Tissue Disorders
3	Survival 5a cut off Anova passing proteins - 2017-09-11 11:25 AM	ADCY,Akt,Ap1,APBA1,calpain,CCND1,CD3,Collagen type I,Creb,ERK,F2,F Actin,Fc gamma receptor,Gsk3,Hsp27,Hsp70,Igm,IKK (complex),IL1,Interferon alpha,Jnk,Laminin,Mek,NFAT (complex),OPRM1,P38 MAPK,p70 S6k,Pdgf (complex),PI3K (complex),PIP5K1B,Pkc(s),Rac,Ras,Rock,Tgf beta	10	5	Cell Cycle, Cellular Development, Cellular Growth and Proliferation
4	Survival 5a cut off Anova passing proteins - 2017-09-11 11:25 AM	ALB,AP2M1,CASP14,CEP290,CFTR,COPS6,CUL4A,CUL4B,Cytokeratin,DCUN1D1,DSG1,EIF4A3,EPS15,IGHA1,INPPL1,INVS,IQCB1,KRT1,KRT9,KRT10,LGR4,MAGOH,NEDD8,NPHP1,NPHP4,PAN2,PIK3R2,RC3H1,RPS6KB2,SH3GL3,TANK,TRAF3IP1,UBASH3B,UBE3A,UCHL5	1	1	Developmental Disorder, Hereditary Disorder, Nephrosis
